# Supplementary material for: Determination of vertical phase separation in a polyfluorene copolymer: fullerene derivative solar cell blend by X-ray photoelectron spectroscopy
Source: Royal Society of Chemistry journal article supplement (doi:10.1039/b906297a), 2009-01-01
Supplement: b906297a.pdf [file b906297a.pdf]

## Supplementary Information

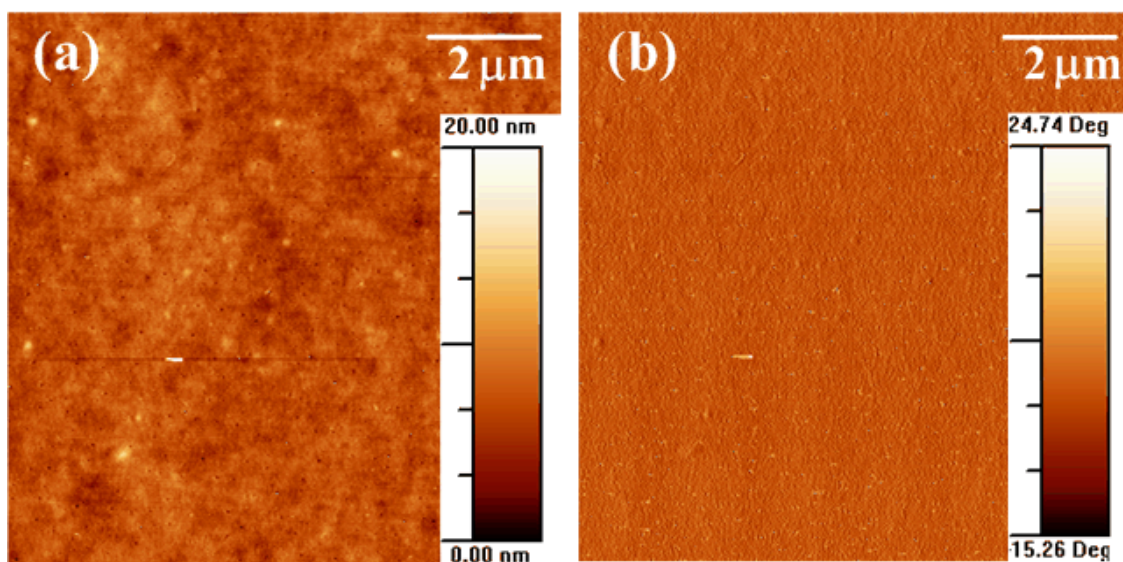

**Figure 1.** TM-AFM height (a) and phase (b) images of F8DTBT:PCBM, 10x10μm.  
RMS roughness = 2.1 nm

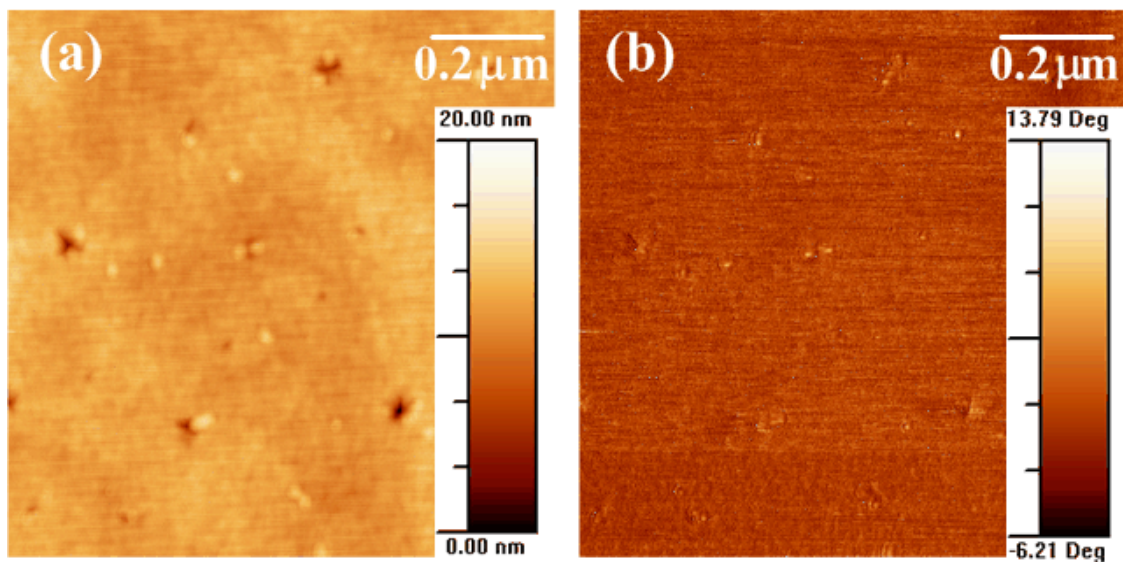

**Figure 2.** TM-AFM height (a) and phase (b) images of F8DTBT:PCBM, 1x1μm. RMS  
roughness = 0.84 nm

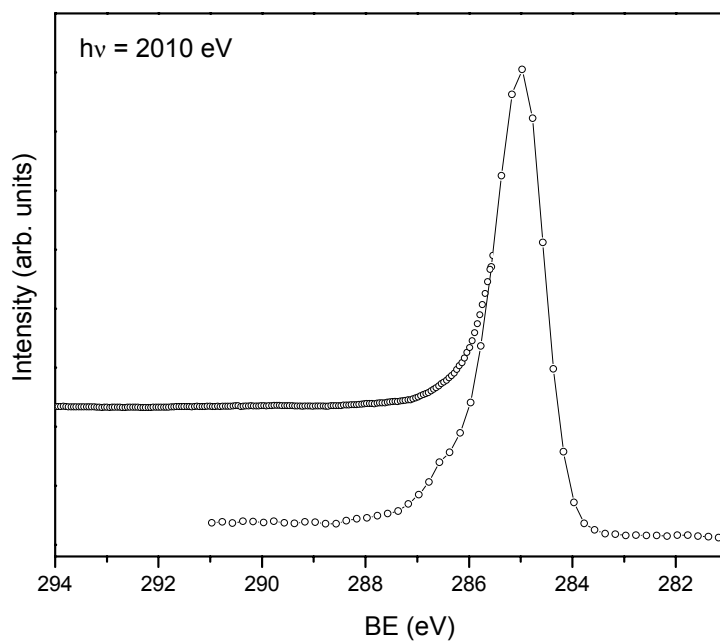

**Figure 3:** X-ray photoemission spectrum of the C1s core level region of the polyfluorene copolymer (F8DTBT) collected with 2010 eV. An inset was added to allow for better comparison with the spectrum of the F8DTBT:PCBM blend taken with the same energy.
